# Supplementary material
Source: MDPI journal article supplement (https://www.mdpi.com/2071-1050/12/11/4519)
Supplement: s1 [file s1]

Supplementary Material

## **Changes in Environmental Footprints Associated with Dietary Intake of Lebanese Adolescents between the Years 1997 and 2009**

**Farah Naja <sup>1</sup>, Nahla Hwalla <sup>1</sup>, Anas El Zouhbi <sup>2</sup>, Nada Abbas <sup>1</sup>, Marie Claire Chamieh <sup>1</sup>, Lara Nasreddine <sup>1,\*</sup> and Lamis Jomaa <sup>1,\*</sup>**

<sup>1</sup> Department of Nutrition and Food Sciences, Faculty of Agricultural and Food Sciences, American University of Beirut, 1107-2020 Beirut, Lebanon; fn14@aub.edu.lb (F.N.); nahla@aub.edu.lb (N.H.); na280@aub.edu.lb (N.A.); mc31@aub.edu.lb (M.C.C.)

<sup>2</sup> Biology Department, Faculty of Arts and Sciences, American University of Beirut, 1107-2020 Beirut, Lebanon; ahe32@mail.aub.edu

\* Correspondence: ln10@aub.edu.lb (L.N.); lj18@aub.edu.lb (L.J.)

**Table S1.** Environmental footprints (water, energy and GHG) of various food groups per kg.

| <b>Food Group</b>                            | <b>Food Group Components</b>                                                            | <b>Water<br/>L/kg</b> | <b>Energy<br/>MJ/kg</b> | <b>GHGs<br/>kg<br/>CO<sub>2</sub>eq/kg</b> |
|----------------------------------------------|-----------------------------------------------------------------------------------------|-----------------------|-------------------------|--------------------------------------------|
|                                              | Breads                                                                                  | 507.968               | 16.1                    | 0.86                                       |
| Breads and<br>Cereals                        | Cereals/cereal-based product                                                            | 484.323               | 16.1                    | 0.86                                       |
|                                              | Rice and rice-based dishes                                                              | 1332.836              | 19.09                   | 2.55                                       |
|                                              | Pasta, pasta-based dishes and noodles                                                   | 521.339               | 17.77                   | 1.33                                       |
|                                              | Bulgur, bulgur-based dishes and wheat-based dishes and foods                            | 584.1                 | 16.1                    | 0.86                                       |
| Meat                                         | Meat/organ meat/meat-based traditional dishes/cured meat                                | 8938.708              | 43                      | 20.4                                       |
| Poultry                                      | Poultry/organs/poultry-based traditional dishes                                         | 3256.508              | 22                      | 3.65                                       |
| Fish                                         | Seafood/seafood based dishes                                                            | 1245.997              | 79.83                   | 3.49                                       |
| Eggs                                         | Eggs/egg-based dishes                                                                   | 2709.95               | 11                      | 3.46                                       |
| Milk                                         | Milk (non-sweetened)                                                                    | 547.744               | 31.73                   | 3.7                                        |
| Milk derivates                               | Dairy products                                                                          | 2308.813              | 5.8                     | 0.406                                      |
|                                              | Yogurt-based dishes                                                                     | 920.586               | 5.8                     | 0.406                                      |
| Sweetened dairy products                     | Sweetened dairy products                                                                | 740.93                | 31.73                   | 3.8                                        |
| Legumes                                      | Legumes and legume-based dishes                                                         | 2072.51               | 2.01                    | 0.51                                       |
| Starchy<br>Vegetables                        | Starchy vegetables                                                                      | 248.7                 | 0.5                     | 0.12                                       |
|                                              | Salad and raw vegetables                                                                | 228.261               | 21.47                   | 1.401                                      |
| Vegetables                                   | Cooked vegetables/vegetable based traditional dishes                                    | 237.211               | 25.09                   | 0.97                                       |
|                                              | Canned vegetables                                                                       | 259.997               | 20.704                  | 1.468                                      |
| Fruits                                       | Mahashi (stuffed vegetables)                                                            | 3468.613              | 29.663                  | 7.91                                       |
|                                              | Fruits (not dried)                                                                      | 632.856               | 5.3                     | 0.42                                       |
|                                              | Dried Fruits                                                                            | 3764.766              | 86.15                   | 6.42                                       |
| Fresh fruit juices                           | Fresh fruit juices                                                                      | 572.893               | 11.9                    | 0.75                                       |
| Nuts                                         | Nuts /seeds                                                                             | 4942.693              | 5                       | 0.42                                       |
| Salty snacks                                 | Salty snacks                                                                            | 1244.367              | 6                       | 0.54                                       |
| SSB                                          | Sweetened fruit juices/beverages, fruit drinks                                          | 2855.683              | 92                      | 4.85                                       |
|                                              | Regular soft drinks                                                                     | 626.992               | 13.71                   | 0.434                                      |
| Hot beverages                                | Tea/coffee/coffee with creamer                                                          | 117.473               | 1                       | 0.35                                       |
|                                              | Pastries, cakes and desserts                                                            | 484.323               | 12.05                   | 1.02                                       |
| Sweets                                       | Sugar, jams                                                                             | 631.91                | 8                       | 0.71                                       |
|                                              | Candies/biscuits/wafers/chocolate bars, chocolate-based biscuits and wafer/cocoa powder | 8897.743              | 51.38                   | 3.08                                       |
|                                              | Traditional sweets                                                                      | 453.868               | 12.05                   | 1.02                                       |
|                                              | Ice-cream                                                                               | 740.93                | 31.73                   | 3.8                                        |
| Fast food                                    | Pizzas and pies                                                                         | 507.968               | 11.6                    | 0.822                                      |
|                                              | Ready to eat sandwiches/burgers                                                         | 3482.069              | 20.713                  | 8.513                                      |
| Added fats / oils                            | Olive oil/olives/avocado                                                                | 4134.232              | 21.34                   | 3.9                                        |
|                                              | Oil and salad dressings                                                                 | 1971.662              | 44                      | 1.56                                       |
| Soups / broth /<br>condiments /<br>Pickles / | Animal-based fat                                                                        | 4915.254              | 90                      | 6.04                                       |
|                                              | Condiments (ex. mayonnaise), spices, and pickles                                        | 2303.026              | 32.9                    | 2.78                                       |
|                                              | Soups/broth                                                                             | 481.732               | 23.002                  | 18                                         |

Abbreviations: GHG: greenhouse gases; SSB: sugar-sweetened beverages.

**Table S2.** Daily environmental footprints contributed by various food groups according to survey years in the study population, Lebanon, 1997 and 2009 among adolescents aged 10–19 years.

| Food Group                         | Water Use              |                        | Energy Use         |                     | GHG Emission              |                      |
|------------------------------------|------------------------|------------------------|--------------------|---------------------|---------------------------|----------------------|
|                                    | L/Day                  |                        | MJ/Day             |                     | kg CO <sub>2</sub> eq/Day |                      |
|                                    | 1997                   | 2009                   | 1997               | 2009                | 1997                      | 2009                 |
| Breads and Cereals                 | <b>113.65 ± 5.34</b>   | <b>166.92 ± 9.29</b>   | 3.05 ± 0.12        | <b>3.84 ± 0.16</b>  | 0.206 ± 0.01              | <b>0.309 ± 0.018</b> |
| Meat                               | <b>423.29 ± 36.08</b>  | <b>545.79 ± 42.26</b>  | 2.04 ± 0.17        | <b>2.63 ± 0.2</b>   | 0.966 ± 0.082             | <b>1.246 ± 0.096</b> |
| Poultry                            | <b>45.57 ± 7.18</b>    | <b>98.3 ± 11.89</b>    | 0.31 ± 0.05        | <b>0.66 ± 0.08</b>  | 0.051 ± 0.008             | <b>0.11 ± 0.013</b>  |
| Fish                               | <b>4.06 ± 1.55</b>     | <b>13.32 ± 2.96</b>    | 0.26 ± 0.1         | <b>0.85 ± 0.19</b>  | 0.011 ± 0.004             | <b>0.037 ± 0.008</b> |
| Eggs                               | 48.85 ± 5.29           | 41.81 ± 9.44           | 0.2 ± 0.02         | 0.17 ± 0.04         | 0.062 ± 0.007             | 0.053 ± 0.012        |
| Milk                               | <b>30.12 ± 2.92</b>    | <b>7.8 ± 1.3</b>       | 1.74 ± 0.17        | <b>0.45 ± 0.08</b>  | 0.203 ± 0.02              | <b>0.053 ± 0.009</b> |
| Milk Derivatives <sup>a</sup>      | 187.65 ± 12.68         | 175.12 ± 12.2          | 0.49 ± 0.03        | 0.48 ± 0.03         | 0.034 ± 0.002             | 0.034 ± 0.002        |
| Sweetened Dairy Products           | 4.35 ± 1.25            | 5.48 ± 1.67            | 0.19 ± 0.05        | 0.23 ± 0.07         | 0.022 ± 0.006             | 0.028 ± 0.009        |
| Legumes                            | 77.56 ± 15.77          | 103.74 ± 14.07         | 0.08 ± 0.02        | 0.1 ± 0.01          | 0.019 ± 0.004             | 0.026 ± 0.003        |
| Starchy Vegetables                 | 12.02 ± 0.91           | 14.83 ± 1.13           | 0.02 ± 0           | 0.03 ± 0            | 0.006 ± 0                 | 0.007 ± 0.001        |
| Vegetables                         | 122.1 ± 13.6           | 128.66 ± 15.39         | 4.13 ± 0.2         | 4.52 ± 0.31         | 0.394 ± 0.032             | 0.414 ± 0.037        |
| Fruits                             | <b>118.85 ± 6.77</b>   | <b>73.05 ± 4.94</b>    | 1.04 ± 0.07        | <b>0.62 ± 0.04</b>  | 0.082 ± 0.005             | <b>0.049 ± 0.003</b> |
| Fresh Fruit Juices                 | 1.02 ± 0.74            | 2.03 ± 0.83            | 0.02 ± 0.02        | 0.04 ± 0.02         | 0.001 ± 0.001             | 0.003 ± 0.001        |
| Nuts                               | 45 ± 7.65              | 34.18 ± 6.31           | 0.05 ± 0.01        | 0.03 ± 0.01         | 0.004 ± 0.001             | 0.003 ± 0.001        |
| Salty Snacks <sup>b</sup>          | <b>11.74 ± 1.28</b>    | <b>22.28 ± 1.79</b>    | 0.06 ± 0.01        | <b>0.11 ± 0.01</b>  | 0.005 ± 0.001             | <b>0.01 ± 0.001</b>  |
| SSB <sup>c</sup>                   | 276.24 ± 18.12         | 408.13 ± 21            | 7.7 ± 0.55         | 11.66 ± 0.66        | 0.352 ± 0.028             | 0.548 ± 0.034        |
| Hot Beverages                      | <b>13.74 ± 1.02</b>    | <b>9.86 ± 0.73</b>     | 0.12 ± 0.01        | <b>0.08 ± 0.01</b>  | 0.041 ± 0.003             | <b>0.029 ± 0.002</b> |
| Sweets                             | 199.32 ± 16.44         | 278.22 ± 21.97         | 2.03 ± 0.13        | 2.16 ± 0.14         | 0.174 ± 0.011             | 0.159 ± 0.011        |
| Fast Food                          | 115.06 ± 11.89         | 133.24 ± 16.77         | 1.13 ± 0.09        | 1.37 ± 0.12         | 0.259 ± 0.029             | 0.298 ± 0.041        |
| Added Fats/Oils                    | <b>35.34 ± 3.26</b>    | <b>66.18 ± 5.72</b>    | 0.27 ± 0.02        | <b>0.65 ± 0.05</b>  | 0.034 ± 0.003             | <b>0.063 ± 0.006</b> |
| Soups/Broth/<br>Condiments/Pickles | 20.45 ± 4.14           | 21.81 ± 2.9            | 0.34 ± 0.07        | 0.45 ± 0.07         | 0.08 ± 0.024              | 0.175 ± 0.05         |
| TOTAL                              | <b>1908.28 ± 52.43</b> | <b>2358.17 ± 62.49</b> | <b>25.31 ± 0.7</b> | <b>31.32 ± 0.91</b> | <b>3.01 ± 0.1</b>         | <b>3.66 ± 0.13</b>   |

Abbreviations: GHG: greenhouse gases; SSB: sugar-sweetened beverages. Data are expressed as mean ± standard error (SE). Differences among group means were tested by independent sample *t*-test. Numbers in bold are statistically significant (*p*-value ≤ 0.05). <sup>a</sup> Including dairy products and yoghurt based dishes. <sup>b</sup> Including chips, salty crackers, popcorn. <sup>c</sup> Including sweetened fruit juices/beverages, fruit drinks and regular soft drinks. <sup>d</sup> Ready to eat sandwiches, burgers, pizzas and pies.

**Table S3.** Linear regression for the association between environmental footprint (EFP, water), survey year and sociodemographic characteristics among Lebanese adolescents.

| Sociodemographic Characteristics                   | Water Use<br>(L/1000 Kcal/day) |                    |         |         |                    |         |
|----------------------------------------------------|--------------------------------|--------------------|---------|---------|--------------------|---------|
|                                                    | Model 1 (Crude)                |                    |         | Model 2 |                    |         |
|                                                    | Coef.                          | 95% CI             | p-value | Coef.   | 95% CI             | p-value |
| <b>Survey year</b> <sup>a</sup> 2009               | 452.56                         | (289.47; 615.64)   | <0.001  | 267.7   | (123.5; 411.91)    | <0.001  |
| <b>Age (years)</b>                                 | 35.3                           | (3.57; 67.02)      | 0.029   | 16.86   | (-10.08; 43.8)     | 0.220   |
| <b>Energy</b>                                      | 1.03                           | (0.94; 1.12)       | <0.001  | 0.95    | (0.85; 1.05)       | <0.001  |
| <b>Sex</b> <sup>b</sup> Females                    | -629.55                        | (-790.42; -468.69) | <0.001  | -117.94 | (-266.96; 31.08)   | 0.121   |
| <b>Governorate</b> <sup>c</sup>                    |                                |                    |         |         |                    |         |
| Bekaa                                              | -190.1                         | (-433.57; 53.38)   | 0.126   | -32.95  | (-237.49; 171.59)  | 0.752   |
| North                                              | -245.11                        | (-469.24; -20.98)  | 0.032   | -334.41 | (-521.52; -147.29) | <0.001  |
| South                                              | -470.75                        | (-703.15; -238.35) | <0.001  | -242.64 | (-442.56; -42.73)  | 0.017   |
| <b>Mother's education level</b> <sup>d</sup>       |                                |                    |         |         |                    |         |
| High school or Technical diploma                   | 356.66                         | (166.33; 546.99)   | <0.001  | 82.62   | (-90.32; 255.56)   | 0.349   |
| University or more                                 | 504.73                         | (273.15; 736.31)   | <0.001  | 328.85  | (96.57; 561.13)    | 0.006   |
| <b>Father's education level</b> <sup>d</sup>       |                                |                    |         |         |                    |         |
| High school or Technical diploma                   | 9.92                           | (-205.81; 225.64)  | 0.928   | 18.64   | (-161.52; 198.79)  | 0.839   |
| University or more                                 | 216.77                         | (1.05; 432.5)      | 0.049   | -24.79  | (-236.11; 186.53)  | 0.818   |
| <b>Crowding Index</b> <sup>e</sup> ≥2 persons/room | -89.82                         | (-285.3; 105.66)   | 0.367   |         |                    |         |
| <b>BMI category</b> <sup>f</sup>                   |                                |                    |         |         |                    |         |
| Overweight                                         | 108.5                          | (-95.96; 312.95)   | 0.298   |         |                    |         |
| Obese                                              | 188.2                          | (-111.48; 487.87)  | 0.218   |         |                    |         |

<sup>a</sup> Compared to 1997. <sup>b</sup> Compared to males. <sup>c</sup> Compared to Beirut and Mount Lebanon. <sup>d</sup> Compared to intermediate level or less. <sup>e</sup> Compared to <2 persons/room. <sup>f</sup> Compared to normal weight/underweight.

**Table S4.** Linear regression for the association between EFP (Energy), survey year and sociodemographic characteristics among Lebanese adolescents.

| Sociodemographic Characteristics                   | Energy Use<br>(MJ / 1000 Kcal/Day) |                   |         |         |                  |         |
|----------------------------------------------------|------------------------------------|-------------------|---------|---------|------------------|---------|
|                                                    | Model 1 (Crude)                    |                   |         | Model 2 |                  |         |
|                                                    | Coef.                              | 95% CI            | p-value | Coef.   | 95% CI           | p-value |
| <b>Survey year</b> <sup>a</sup> 2009               | 6.07                               | (3.75; 8.38)      | <0.001  | 4.3     | (2.09; 6.52)     | <0.001  |
| <b>Age (years)</b>                                 | 0.47                               | (0.02; 0.92)      | 0.043   | 0.14    | (-0.27; 0.56)    | 0.492   |
| <b>Energy</b>                                      | 0.0127                             | (0.0114; 0.0140)  | <0.001  | 0.0117  | (0.0101; 0.0132) | <0.001  |
| <b>Sex</b> <sup>b</sup> Females                    | -8.03                              | (-10.32; -5.73)   | <0.001  | -1.42   | (-3.71; 0.87)    | 0.225   |
| <b>Governorate</b> <sup>c</sup>                    |                                    |                   |         |         |                  |         |
| Bekaa                                              | -1.48                              | (-4.94; 1.97)     | 0.400   | 0.59    | (-2.55; 3.74)    | 0.712   |
| North                                              | -2.54                              | (-5.72; 0.64)     | 0.117   | -3.39   | (-6.27; -0.51)   | 0.021   |
| South                                              | -5.88                              | (-9.17; -2.58)    | <0.001  | -3.05   | (-6.12; 0.03)    | 0.052   |
| <b>Mother's education level</b> <sup>d</sup>       |                                    |                   |         |         |                  |         |
| High school or Technical diploma                   | 4.37                               | (1.64; 7.1)       | 0.002   | 0.51    | (-2.15; 3.17)    | 0.708   |
| University or more                                 | 4.91                               | (1.59; 8.24)      | 0.004   | 1       | (-2.57; 4.57)    | 0.584   |
| <b>Father's education level</b> <sup>d</sup>       |                                    |                   |         |         |                  |         |
| High school or Technical diploma                   | 0.59                               | (-2.51; 3.69)     | 0.707   | 1.33    | (-1.44; 4.1)     | 0.346   |
| University or more                                 | 4.52                               | (1.42; 7.62)      | 0.004   | 3.28    | (0.03; 6.53)     | 0.048   |
| <b>Crowding Index</b> <sup>e</sup> ≥2 persons/room | 0.0043                             | (-2.7776; 2.7689) | 0.998   |         |                  |         |
| <b>BMI category</b> <sup>f</sup>                   |                                    |                   |         |         |                  |         |
| Overweight                                         | 3.37                               | (0.48; 6.26)      | 0.023   |         |                  |         |
| Obese                                              | 2.13                               | (-2.11; 6.38)     | 0.324   |         |                  |         |

<sup>a</sup> Compared to 1997. <sup>b</sup> Compared to males. <sup>c</sup> Compared to Beirut and Mount Lebanon. <sup>d</sup> Compared to intermediate level or less. <sup>e</sup> Compared to <2 persons/room. <sup>f</sup> Compared to normal weight/underweight.

**Table S5.** Linear regression for the association between EFP (GHG), survey year and sociodemographic characteristics among Lebanese adolescents.

| Sociodemographic Characteristics                   | GHG Emission<br>(kg CO <sub>2</sub> eq/1000 Kcal/Day) |                 |         |         |                |         |
|----------------------------------------------------|-------------------------------------------------------|-----------------|---------|---------|----------------|---------|
|                                                    | Model 1 (Crude)                                       |                 |         | Model 2 |                |         |
|                                                    | Coef.                                                 | 95% CI          | p-value | Coef.   | 95% CI         | p-value |
| <b>Survey year</b> <sup>a</sup> 2009               | 0.65                                                  | (0.32; 0.97)    | <0.001  | 0.44    | (0.11; 0.77)   | 0.009   |
| <b>Age (years)</b>                                 | 0.057                                                 | (-0.006; 0.12)  | 0.078   | 0.028   | (-0.033; 0.09) | 0.366   |
| <b>Energy</b>                                      | 0.001                                                 | (0.001; 0.002)  | <0.001  | 0.001   | (0.001; 0.002) | <0.001  |
| <b>Sex</b> <sup>b</sup> Females                    | -1.165                                                | (-1.48; -0.84)  | <0.001  | -0.451  | (-0.79; -0.11) | 0.009   |
| <b>Governorate</b> <sup>c</sup>                    |                                                       |                 |         |         |                |         |
| Bekaa                                              | -0.241                                                | (-0.72; 0.24)   | 0.328   | 0.06    | (-0.41; 0.52)  | 0.813   |
| North                                              | -0.602                                                | (-1.05; -0.16)  | 0.008   | -0.72   | (-1.14; -0.30) | 0.001   |
| South                                              | -0.962                                                | (-1.42; -0.5)   | <0.001  | -0.63   | (-1.09; -0.17) | 0.007   |
| <b>Mother's education level</b> <sup>d</sup>       |                                                       |                 |         |         |                |         |
| High school or Technical diploma                   | 0.504                                                 | (0.12; 0.89)    | 0.010   | 0.141   | (-0.25; 0.53)  | 0.484   |
| University or more                                 | 0.98                                                  | (0.51; 1.45)    | <0.001  | 0.68    | (0.15; 1.21)   | 0.012   |
| <b>Father's education level</b> <sup>d</sup>       |                                                       |                 |         |         |                |         |
| High school or Technical diploma                   | 0.006                                                 | (-0.431; 0.443) | 0.979   | 0.001   | (-0.41; 0.41)  | 0.996   |
| University or more                                 | 0.53                                                  | (0.09; 0.97)    | 0.017   | 0.015   | (-0.47; 0.49)  | 0.950   |
| <b>Crowding Index</b> <sup>e</sup> ≥2 persons/room | -0.12                                                 | (-0.51; 0.26)   | 0.539   |         |                |         |
| <b>BMI category</b> <sup>f</sup>                   |                                                       |                 |         |         |                |         |
| Overweight                                         | 0.14                                                  | (-0.27; 0.55)   | 0.500   |         |                |         |
| Obese                                              | 0.123                                                 | (-0.47; 0.72)   | 0.684   |         |                |         |

Abbreviations: GHG: greenhouse gases. <sup>a</sup> Compared to 1997. <sup>b</sup> Compared to males. <sup>c</sup> Compared to Beirut and Mount Lebanon. <sup>d</sup> Compared to intermediate level or less. <sup>e</sup> Compared to <2 persons/room. <sup>f</sup> Compared to normal weight/underweight.
